# Supplementary material for: The Role of Overexpressed Apolipoprotein AV in Insulin-Resistant Hepatocytes
Source: Biomed Res Int. 2020 Apr 21;2020:3268505. doi: 10.1155/2020/3268505 (PMC7193279; doi:10.1155/2020/3268505)
Supplement: Supplementary Materials — Supplementary File 1: the detailed data information of each node in the PPI network (Figure 4). [file 3268505.f1.zip]

Archive with 2 entries (2 files):
- 3268505.f1/Cover Letter.docx
- 3268505.f1/Supplementary file 1-revised.txt
