# Supplementary material for: The Role of Overexpressed Apolipoprotein AV in Insulin-Resistant Hepatocytes
Source: Biomed Res Int. 2020 Apr 21;2020:3268505. doi: 10.1155/2020/3268505 (PMC7193279; doi:10.1155/2020/3268505)
Supplement: Supplementary Materials — Supplementary File 1: the detailed data information of each node in the PPI network (Figure 4). [file 3268505.f1.zip › 3268505.f1/Supplementary file 1-revised.txt]

X.node1	node2	node1_string_internal_id	node2_string_internal_id	node1_external_id	node2_external_id	neighborhood_on_chromosome	gene_fusion	phylogenetic_cooccurrence	homology	coexpression	experimentally_determined_interaction	database_annotated	automated_textmining	combined_score
MCM7	CDC6	1848945	1842453	9606.ENSP00000307288	9606.ENSP00000209728	0	0	0	0	0.435	0.999	0.9	0.915	0.999
ANGPT1	TEK	1861743	1857139	9606.ENSP00000428340	9606.ENSP00000369375	0	0	0	0	0	0.999	0.9	0.983	0.999
GINS1	GINS2	1845151	1844233	9606.ENSP00000262460	9606.ENSP00000253462	0	0	0	0	0.601	0.998	0.9	0.944	0.999
CSF3R	CSF3	1855831	1843025	9606.ENSP00000362195	9606.ENSP00000225474	0	0	0	0	0	0.98	0.8	0.942	0.999
PARK2	SNCAIP	1854466	1844894	9606.ENSP00000355865	9606.ENSP00000261368	0	0	0	0	0	0.999	0.9	0.733	0.999
ANGPT4	TEK	1857455	1857139	9606.ENSP00000371347	9606.ENSP00000369375	0	0	0	0	0	0.811	0.9	0.938	0.998
ACAN	ADAMTS5	1859267	1846938	9606.ENSP00000387356	9606.ENSP00000284987	0	0	0	0	0	0.576	0.9	0.963	0.998
PLXNA4	SEMA3A	1850523	1845736	9606.ENSP00000323194	9606.ENSP00000265362	0	0	0	0	0	0	0.9	0.966	0.996
ATRIP	MCM7	1850516	1848945	9606.ENSP00000323099	9606.ENSP00000307288	0	0	0	0	0	0.567	0.9	0.889	0.994
MCM7	GINS1	1848945	1845151	9606.ENSP00000307288	9606.ENSP00000262460	0	0	0	0	0.173	0.625	0.9	0.674	0.988
HIST2H3D	HIST1H4H	1851568	1847164	9606.ENSP00000333277	9606.ENSP00000289352	0	0	0	0	0.183	0.971	0	0.562	0.988
E2F1	CDC6	1852951	1842453	9606.ENSP00000345571	9606.ENSP00000209728	0	0	0	0	0	0.747	0.9	0.566	0.988
MCM7	GINS2	1848945	1844233	9606.ENSP00000307288	9606.ENSP00000253462	0	0	0	0	0.133	0.625	0.9	0.438	0.979
E2F2	E2F1	1854335	1852951	9606.ENSP00000355249	9606.ENSP00000345571	0	0	0	0.862	0	0.733	0.9	0.769	0.975
GRAP2	ZAP70	1852185	1845655	9606.ENSP00000339186	9606.ENSP00000264972	0	0	0	0	0	0.149	0.9	0.736	0.975
E2F2	CDC6	1854335	1842453	9606.ENSP00000355249	9606.ENSP00000209728	0	0	0	0	0	0	0.9	0.717	0.97
ATRIP	CDC6	1850516	1842453	9606.ENSP00000323099	9606.ENSP00000209728	0	0	0	0	0	0.576	0.9	0.253	0.965
HDAC9	DNMT1	1860731	1853859	9606.ENSP00000408617	9606.ENSP00000352516	0	0	0	0	0	0.101	0	0.963	0.965
LTA	TNFRSF1B	1860412	1856466	9606.ENSP00000403495	9606.ENSP00000365435	0	0	0	0	0	0.801	0.8	0.147	0.963
THRA	ESR1	1845577	1842435	9606.ENSP00000264637	9606.ENSP00000206249	0	0	0	0.653	0	0.566	0.9	0.51	0.962
H2AFX	HIST1H2BD	1856252	1847163	9606.ENSP00000364310	9606.ENSP00000289316	0	0	0	0	0.492	0.251	0.8	0.564	0.962
MUC19	MUC17	1859854	1848442	9606.ENSP00000395253	9606.ENSP00000302716	0	0	0	0	0	0	0.9	0.633	0.961
INHBC	INHBA	1849100	1843613	9606.ENSP00000308716	9606.ENSP00000242208	0	0	0	0.856	0	0.566	0.9	0.752	0.959
DNMT1	E2F1	1853859	1852951	9606.ENSP00000352516	9606.ENSP00000345571	0	0	0	0	0.07	0.564	0.9	0.116	0.959
CXXC1	DNMT1	1859496	1853859	9606.ENSP00000390475	9606.ENSP00000352516	0	0	0	0	0	0.569	0	0.908	0.958
ABI3BP	ABI3	1846902	1843063	9606.ENSP00000284322	9606.ENSP00000225941	0	0	0	0	0	0.576	0	0.903	0.957
GRAP2	BLNK	1852185	1842996	9606.ENSP00000339186	9606.ENSP00000224337	0	0	0	0	0	0.57	0	0.896	0.953
INCENP	RAD21	1858231	1847857	9606.ENSP00000378295	9606.ENSP00000297338	0	0	0	0	0.17	0	0.9	0.452	0.95
MACROD1	ESR1	1844388	1842435	9606.ENSP00000255681	9606.ENSP00000206249	0	0	0	0	0	0.576	0	0.885	0.949
ACAN	PRELP	1859267	1852755	9606.ENSP00000387356	9606.ENSP00000343924	0	0	0	0	0	0	0.9	0.509	0.948
SLC2A4	RAB8A	1850296	1848223	9606.ENSP00000320935	9606.ENSP00000300935	0	0	0	0	0	0	0.9	0.47	0.944
ATRIP	CDC25C	1850516	1850370	9606.ENSP00000323099	9606.ENSP00000321656	0	0	0	0	0	0	0.9	0.472	0.944
UCP3	SLC2A4	1850575	1850296	9606.ENSP00000323740	9606.ENSP00000320935	0	0	0	0	0	0	0	0.943	0.943
COL15A1	COL14A1	1856217	1847909	9606.ENSP00000364140	9606.ENSP00000297848	0	0	0	0	0	0	0.9	0.424	0.939
H2AFX	RAD21	1856252	1847857	9606.ENSP00000364310	9606.ENSP00000297338	0	0	0	0	0	0.095	0.9	0.374	0.938
ACAN	BMP2	1859267	1856935	9606.ENSP00000387356	9606.ENSP00000368104	0	0	0	0	0	0	0	0.938	0.938
SCN4B	SCN2A	1850453	1846845	9606.ENSP00000322460	9606.ENSP00000283256	0	0	0	0	0	0.576	0.72	0.516	0.937
WNT9A	SFRP1	1846230	1842801	9606.ENSP00000272164	9606.ENSP00000220772	0	0	0	0	0	0.232	0.8	0.597	0.932
E2F1	ESR1	1852951	1842435	9606.ENSP00000345571	9606.ENSP00000206249	0	0	0	0	0	0.576	0	0.836	0.927
H2AFX	HIST1H2BC	1856252	1850384	9606.ENSP00000364310	9606.ENSP00000321744	0	0	0	0	0.492	0.644	0	0.627	0.926
SPC24	INCENP	1863909	1858231	9606.ENSP00000465075	9606.ENSP00000378295	0	0	0	0	0.11	0	0.9	0.214	0.923
CYP46A1	CYP27A1	1845001	1844601	9606.ENSP00000261835	9606.ENSP00000258415	0	0	0.526	0.659	0	0	0.9	0.219	0.922
COL15A1	COL17A1	1856217	1852387	9606.ENSP00000364140	9606.ENSP00000340937	0	0	0	0	0	0	0.9	0.255	0.922
POLR2A	ESR1	1849743	1842435	9606.ENSP00000314949	9606.ENSP00000206249	0	0	0	0	0	0.111	0.9	0.185	0.921
COMMD1	CFTR	1849045	1842118	9606.ENSP00000308236	9606.ENSP00000003084	0	0	0	0	0	0.576	0	0.817	0.919
GRPR	CCKBR	1857195	1851860	9606.ENSP00000369643	9606.ENSP00000335544	0	0	0	0.636	0	0	0.9	0.535	0.918
RGMA	BMP2	1862790	1856935	9606.ENSP00000452126	9606.ENSP00000368104	0	0	0	0	0	0	0.9	0.221	0.918
MYL4	TMOD1	1853126	1844687	9606.ENSP00000347055	9606.ENSP00000259365	0	0	0	0	0	0	0.9	0.21	0.917
COL4A4	COL15A1	1858410	1856217	9606.ENSP00000379866	9606.ENSP00000364140	0	0	0	0	0	0	0.9	0.187	0.915
RPL34	EIF3I	1858216	1855943	9606.ENSP00000378160	9606.ENSP00000362688	0	0	0	0	0.183	0	0.9	0	0.914
CDH15	CDH11	1847184	1846023	9606.ENSP00000289746	9606.ENSP00000268603	0	0	0	0.808	0	0	0.9	0.769	0.914
CXCL1	FPR1	1858329	1848441	9606.ENSP00000379110	9606.ENSP00000302707	0	0	0	0	0	0	0.9	0.172	0.913
KITLG	SNAI2	1843134	1842190	9606.ENSP00000228280	9606.ENSP00000020945	0	0	0	0	0	0	0.9	0.16	0.912
P2RY2	P2RY6	1849283	1849222	9606.ENSP00000310305	9606.ENSP00000309771	0	0	0	0.87	0	0	0.9	0.857	0.911
E2F2	DNMT1	1854335	1853859	9606.ENSP00000355249	9606.ENSP00000352516	0	0	0	0	0	0	0.9	0.137	0.91
THBS2	THBS4	1854448	1852244	9606.ENSP00000355751	9606.ENSP00000339730	0	0	0	0.884	0	0	0.9	0.811	0.909
F2RL2	PARD6A	1847768	1842735	9606.ENSP00000296641	9606.ENSP00000219255	0	0	0	0	0	0	0.9	0.126	0.908
CD34	CSF3	1849250	1843025	9606.ENSP00000310036	9606.ENSP00000225474	0	0	0	0	0	0	0	0.907	0.907
GRPR	AGTR1	1857195	1846323	9606.ENSP00000369643	9606.ENSP00000273430	0	0	0	0.697	0	0	0.9	0.277	0.907
CCKBR	P2RY2	1851860	1849283	9606.ENSP00000335544	9606.ENSP00000310305	0	0	0	0	0	0	0.9	0.11	0.907
ADRA1D	AGTR1	1857034	1846323	9606.ENSP00000368766	9606.ENSP00000273430	0	0	0	0.643	0	0	0.9	0.228	0.906
CCKBR	GPR4	1851860	1850178	9606.ENSP00000335544	9606.ENSP00000319744	0	0	0	0	0	0	0.9	0.101	0.906
BMP2	GATA6	1856935	1846076	9606.ENSP00000368104	9606.ENSP00000269216	0	0	0	0	0	0	0	0.904	0.905
LPAR4	GPR4	1855877	1850178	9606.ENSP00000362398	9606.ENSP00000319744	0	0	0	0.765	0	0	0.9	0.252	0.905
HDAC9	SLC2A4	1860731	1850296	9606.ENSP00000408617	9606.ENSP00000320935	0	0	0	0	0	0	0	0.904	0.905
COL17A1	COL14A1	1852387	1847909	9606.ENSP00000340937	9606.ENSP00000297848	0	0	0	0.61	0	0	0.9	0.154	0.904
ANGPT1	PDGFRB	1861743	1844996	9606.ENSP00000428340	9606.ENSP00000261799	0	0	0	0	0	0.063	0.8	0.532	0.904
KITLG	CDC6	1843134	1842453	9606.ENSP00000228280	9606.ENSP00000209728	0	0	0	0	0	0	0.9	0.081	0.904
PARD6A	TGFBR3	1842735	1842474	9606.ENSP00000219255	9606.ENSP00000212355	0	0	0	0	0	0	0.9	0.081	0.904
PDGFRB	KITLG	1844996	1843134	9606.ENSP00000261799	9606.ENSP00000228280	0	0	0	0	0	0	0.8	0.538	0.903
COL4A4	COL14A1	1858410	1847909	9606.ENSP00000379866	9606.ENSP00000297848	0	0	0	0	0	0	0.9	0.075	0.903
P2RY2	FPR1	1849283	1848441	9606.ENSP00000310305	9606.ENSP00000302707	0	0	0	0.714	0	0	0.9	0.151	0.903
P2RY2	F2RL2	1849283	1847768	9606.ENSP00000310305	9606.ENSP00000296641	0	0	0	0.723	0	0	0.9	0.113	0.902
LPAR4	P2RY6	1855877	1849222	9606.ENSP00000362398	9606.ENSP00000309771	0	0	0	0.797	0	0	0.9	0.136	0.902
COL4A4	COL17A1	1858410	1852387	9606.ENSP00000379866	9606.ENSP00000340937	0	0	0	0	0	0	0.9	0.064	0.902
CCKBR	AGTR1	1851860	1846323	9606.ENSP00000335544	9606.ENSP00000273430	0	0	0	0.654	0	0	0.9	0.107	0.902
LPAR4	P2RY2	1855877	1849283	9606.ENSP00000362398	9606.ENSP00000310305	0	0	0	0.771	0	0	0.9	0.158	0.902
CXCL2	CXCL1	1861702	1858329	9606.ENSP00000427279	9606.ENSP00000379110	0	0	0	0.976	0	0	0.9	0.815	0.901
GRPR	GPR4	1857195	1850178	9606.ENSP00000369643	9606.ENSP00000319744	0	0	0	0.632	0	0	0.9	0.09	0.901
ADRA1D	LPAR4	1857034	1855877	9606.ENSP00000368766	9606.ENSP00000362398	0	0	0	0.639	0	0	0.9	0	0.9
MCM7	KITLG	1848945	1843134	9606.ENSP00000307288	9606.ENSP00000228280	0	0	0	0	0	0	0.9	0.047	0.9
GRPR	P2RY6	1857195	1849222	9606.ENSP00000369643	9606.ENSP00000309771	0	0	0	0.64	0	0	0.9	0	0.9
LPAR4	AGTR1	1855877	1846323	9606.ENSP00000362398	9606.ENSP00000273430	0	0	0	0.779	0	0	0.9	0	0.9
LPAR4	CCKBR	1855877	1851860	9606.ENSP00000362398	9606.ENSP00000335544	0	0	0	0.639	0	0	0.9	0	0.9
CXCL2	SSTR2	1861702	1853555	9606.ENSP00000427279	9606.ENSP00000350198	0	0	0	0	0	0	0.9	0	0.9
ADRA1D	F2RL2	1857034	1847768	9606.ENSP00000368766	9606.ENSP00000296641	0	0	0	0	0	0	0.9	0	0.9
CCKBR	P2RY6	1851860	1849222	9606.ENSP00000335544	9606.ENSP00000309771	0	0	0	0.638	0	0	0.9	0	0.9
P2RY6	F2RL2	1849222	1847768	9606.ENSP00000309771	9606.ENSP00000296641	0	0	0	0.73	0	0	0.9	0	0.9
ADRA1D	P2RY6	1857034	1849222	9606.ENSP00000368766	9606.ENSP00000309771	0	0	0	0	0	0	0.9	0	0.9
SSTR2	TAS2R42	1853555	1851666	9606.ENSP00000350198	9606.ENSP00000334050	0	0	0	0	0	0	0.9	0	0.9
GPR4	P2RY6	1850178	1849222	9606.ENSP00000319744	9606.ENSP00000309771	0	0	0	0.73	0	0	0.9	0	0.9
MAP2K6	CARD9	1864007	1855538	9606.ENSP00000468348	9606.ENSP00000360797	0	0	0	0	0	0	0.9	0	0.9
GPR4	P2RY2	1850178	1849283	9606.ENSP00000319744	9606.ENSP00000310305	0	0	0	0.735	0	0	0.9	0	0.9
CXCL1	HCAR2	1858329	1857878	9606.ENSP00000379110	9606.ENSP00000375066	0	0	0	0	0	0	0.9	0.042	0.9
HCAR2	SSTR2	1857878	1853555	9606.ENSP00000375066	9606.ENSP00000350198	0	0	0	0.697	0	0	0.9	0	0.9
CXCL2	TAS2R42	1861702	1851666	9606.ENSP00000427279	9606.ENSP00000334050	0	0	0	0	0	0	0.9	0	0.9
GRPR	F2RL2	1857195	1847768	9606.ENSP00000369643	9606.ENSP00000296641	0	0	0	0.644	0	0	0.9	0	0.9
MAP2K6	CDH15	1864007	1847184	9606.ENSP00000468348	9606.ENSP00000289746	0	0	0	0	0	0	0.9	0	0.9
P2RY2	AGTR1	1849283	1846323	9606.ENSP00000310305	9606.ENSP00000273430	0	0	0	0.693	0	0	0.9	0	0.9
DAPP1	PIK3AP1	1861599	1852259	9606.ENSP00000423602	9606.ENSP00000339826	0	0	0	0	0	0	0.9	0	0.9
CXCL2	HCAR2	1861702	1857878	9606.ENSP00000427279	9606.ENSP00000375066	0	0	0	0	0	0	0.9	0	0.9
ACY3	ASS1	1844352	1844185	9606.ENSP00000255082	9606.ENSP00000253004	0	0	0	0	0	0	0.9	0	0.9
P2RY6	AGTR1	1849222	1846323	9606.ENSP00000309771	9606.ENSP00000273430	0	0	0	0.745	0	0	0.9	0	0.9
LPAR4	F2RL2	1855877	1847768	9606.ENSP00000362398	9606.ENSP00000296641	0	0	0	0.743	0	0	0.9	0	0.9
ADRA1D	P2RY2	1857034	1849283	9606.ENSP00000368766	9606.ENSP00000310305	0	0	0	0	0	0	0.9	0	0.9
ADRA1D	CCKBR	1857034	1851860	9606.ENSP00000368766	9606.ENSP00000335544	0	0	0	0.668	0	0	0.9	0	0.9
TAS2R42	FPR1	1851666	1848441	9606.ENSP00000334050	9606.ENSP00000302707	0	0	0	0	0	0	0.9	0	0.9
HJURP	HIST1H4H	1861060	1847164	9606.ENSP00000414109	9606.ENSP00000289352	0	0	0	0	0	0.9	0	0	0.9
GRPR	P2RY2	1857195	1849283	9606.ENSP00000369643	9606.ENSP00000310305	0	0	0	0.636	0	0	0.9	0	0.9
SPC24	RAD21	1863909	1847857	9606.ENSP00000465075	9606.ENSP00000297338	0	0	0	0	0	0	0.9	0	0.9
GPR4	AGTR1	1850178	1846323	9606.ENSP00000319744	9606.ENSP00000273430	0	0	0	0.716	0	0	0.9	0.041	0.9
CXCL1	TAS2R42	1858329	1851666	9606.ENSP00000379110	9606.ENSP00000334050	0	0	0	0	0	0	0.9	0	0.9
SPTB	SPTBN5	1857851	1849983	9606.ENSP00000374372	9606.ENSP00000317790	0	0	0	0.736	0	0	0.9	0.068	0.9
MAP2K6	FPR1	1864007	1848441	9606.ENSP00000468348	9606.ENSP00000302707	0	0	0	0	0	0	0.9	0	0.9
GPR4	F2RL2	1850178	1847768	9606.ENSP00000319744	9606.ENSP00000296641	0	0	0	0.719	0	0	0.9	0	0.9
CCKBR	F2RL2	1851860	1847768	9606.ENSP00000335544	9606.ENSP00000296641	0	0	0	0.634	0	0	0.9	0	0.9
F2RL2	AGTR1	1847768	1846323	9606.ENSP00000296641	9606.ENSP00000273430	0	0	0	0.714	0	0	0.9	0.047	0.9
SSTR2	FPR1	1853555	1848441	9606.ENSP00000350198	9606.ENSP00000302707	0	0	0	0.772	0	0	0.9	0	0.9
COL4A4	ALPL	1858410	1856185	9606.ENSP00000379866	9606.ENSP00000363965	0	0	0	0	0	0	0.9	0	0.9
GRPR	LPAR4	1857195	1855877	9606.ENSP00000369643	9606.ENSP00000362398	0	0	0	0.655	0	0	0.9	0	0.9
CXCL1	SSTR2	1858329	1853555	9606.ENSP00000379110	9606.ENSP00000350198	0	0	0	0	0	0	0.9	0	0.9
HCAR2	FPR1	1857878	1848441	9606.ENSP00000375066	9606.ENSP00000302707	0	0	0	0.682	0	0	0.9	0	0.9
GPC6	APOE	1856600	1844127	9606.ENSP00000366246	9606.ENSP00000252486	0	0	0	0	0	0	0.9	0	0.9
ADRA1D	GPR4	1857034	1850178	9606.ENSP00000368766	9606.ENSP00000319744	0	0	0	0.625	0	0	0.9	0	0.9
GRPR	ADRA1D	1857195	1857034	9606.ENSP00000369643	9606.ENSP00000368766	0	0	0	0.64	0	0	0.9	0	0.9
HCAR2	TAS2R42	1857878	1851666	9606.ENSP00000375066	9606.ENSP00000334050	0	0	0	0	0	0	0.9	0	0.9
CXCL2	FPR1	1861702	1848441	9606.ENSP00000427279	9606.ENSP00000302707	0	0	0	0	0	0	0.9	0	0.9
ESR1	SNAI2	1842435	1842190	9606.ENSP00000206249	9606.ENSP00000020945	0	0	0	0	0	0	0	0.891	0.891
SUGT1P3	PPIL6	1861963	1859628	9606.ENSP00000434236	9606.ENSP00000392257	0	0	0	0	0.736	0.332	0	0.398	0.884
MAPK10	DUSP2	1853804	1847145	9606.ENSP00000352157	9606.ENSP00000288943	0	0	0	0	0	0.102	0.8	0.407	0.884
KMO	OPN3	1854396	1854395	9606.ENSP00000355517	9606.ENSP00000355512	0	0	0	0	0	0	0	0.883	0.883
NPRL3	MAF	1858775	1850887	9606.ENSP00000382834	9606.ENSP00000327048	0	0	0	0	0	0	0	0.882	0.882
MAP2K6	MAPK10	1864007	1853804	9606.ENSP00000468348	9606.ENSP00000352157	0	0	0.332	0.661	0	0.253	0.8	0.454	0.88
TEK	KITLG	1857139	1843134	9606.ENSP00000369375	9606.ENSP00000228280	0	0	0	0	0	0	0.8	0.417	0.878
POLR2A	MCM7	1849743	1848945	9606.ENSP00000314949	9606.ENSP00000307288	0	0	0	0	0	0.821	0	0.341	0.878
NPC1L1	ABCG5	1847179	1844808	9606.ENSP00000289547	9606.ENSP00000260645	0	0	0	0	0	0	0	0.877	0.877
MAPK10	HSPA6	1853804	1849273	9606.ENSP00000352157	9606.ENSP00000310219	0	0	0	0	0	0	0.8	0.396	0.874
PIK3CG	PDGFRB	1853801	1844996	9606.ENSP00000352121	9606.ENSP00000261799	0	0	0	0	0	0.088	0.8	0.366	0.874
HDAC9	PDGFRB	1860731	1844996	9606.ENSP00000408617	9606.ENSP00000261799	0	0	0	0	0	0	0	0.872	0.872
PIK3CG	ZAP70	1853801	1845655	9606.ENSP00000352121	9606.ENSP00000264972	0	0	0	0	0	0.088	0.8	0.351	0.871
NIPAL4	ABCA12	1849451	1846282	9606.ENSP00000311687	9606.ENSP00000272895	0	0	0	0	0	0	0	0.861	0.861
HDAC9	SNAI2	1860731	1842190	9606.ENSP00000408617	9606.ENSP00000020945	0	0	0	0	0	0	0	0.86	0.86
HIST1H4I	HIST1H2BC	1853039	1850384	9606.ENSP00000346316	9606.ENSP00000321744	0	0	0	0	0.269	0.284	0	0.753	0.859
DNMT1	ESR1	1853859	1842435	9606.ENSP00000352516	9606.ENSP00000206249	0	0	0	0	0	0	0	0.858	0.858
TCF7L1	WNT9A	1846772	1846230	9606.ENSP00000282111	9606.ENSP00000272164	0	0	0	0	0	0.304	0	0.804	0.858
ALOXE3	NIPAL4	1849737	1849451	9606.ENSP00000314879	9606.ENSP00000311687	0	0	0	0	0	0	0	0.858	0.858
FGF17	PDGFRB	1853842	1844996	9606.ENSP00000352414	9606.ENSP00000261799	0	0	0	0	0	0	0.8	0.318	0.857
HIST1H2BC	HIST1H4H	1850384	1847164	9606.ENSP00000321744	9606.ENSP00000289352	0	0	0	0	0.269	0.284	0	0.743	0.853
HIST2H2AA4	HIST1H4H	1854965	1847164	9606.ENSP00000358155	9606.ENSP00000289352	0	0.001	0	0	0.359	0.363	0	0.659	0.848
PGM5	MDH1B	1858389	1856114	9606.ENSP00000379678	9606.ENSP00000363533	0	0	0	0	0.679	0	0	0.541	0.846
HIST2H2BE	HIST1H4I	1854962	1853039	9606.ENSP00000358151	9606.ENSP00000346316	0	0	0	0	0.269	0.284	0	0.722	0.842
TGM2	AGA	1854355	1845569	9606.ENSP00000355330	9606.ENSP00000264595	0	0	0	0	0	0	0	0.842	0.842
TEK	FGF17	1857139	1853842	9606.ENSP00000369375	9606.ENSP00000352414	0	0	0	0	0	0	0.8	0.239	0.841
PIK3CG	PIK3AP1	1853801	1852259	9606.ENSP00000352121	9606.ENSP00000339826	0	0	0	0	0	0	0.8	0.238	0.841
HIST2H2AA4	HIST1H4I	1854965	1853039	9606.ENSP00000358155	9606.ENSP00000346316	0	0.001	0	0	0.359	0.26	0	0.675	0.832
WEE2	CDC25C	1858500	1850370	9606.ENSP00000380675	9606.ENSP00000321656	0	0	0	0	0.113	0.578	0	0.583	0.83
HIST2H2BE	HIST1H4H	1854962	1847164	9606.ENSP00000358151	9606.ENSP00000289352	0	0	0	0	0.269	0.284	0	0.7	0.829
H2AFX	HIST2H2BE	1856252	1854962	9606.ENSP00000364310	9606.ENSP00000358151	0	0	0	0	0.492	0.251	0	0.582	0.827
H2AFX	HIST1H4H	1856252	1847164	9606.ENSP00000364310	9606.ENSP00000289352	0	0.001	0	0	0.359	0.363	0	0.61	0.827
THBS2	JAG1	1854448	1844342	9606.ENSP00000355751	9606.ENSP00000254958	0	0	0	0	0	0	0	0.826	0.826
E2F2	MCM7	1854335	1848945	9606.ENSP00000355249	9606.ENSP00000307288	0	0	0	0	0.087	0	0	0.815	0.824
SLAMF7	MAF	1854715	1850887	9606.ENSP00000357022	9606.ENSP00000327048	0	0	0	0	0	0	0	0.824	0.824
COL4A4	ITGB6	1858410	1846843	9606.ENSP00000379866	9606.ENSP00000283249	0	0	0	0	0	0	0.8	0.148	0.822
ANGPT1	FRZB	1861743	1847536	9606.ENSP00000428340	9606.ENSP00000295113	0	0	0	0	0	0	0	0.822	0.822
ANGPT4	PDGFRB	1857455	1844996	9606.ENSP00000371347	9606.ENSP00000261799	0	0	0	0	0	0.063	0.8	0.126	0.821
THBS2	ITGB6	1854448	1846843	9606.ENSP00000355751	9606.ENSP00000283249	0	0	0	0	0	0	0.8	0.137	0.82
A2M	APOE	1850599	1844127	9606.ENSP00000323929	9606.ENSP00000252486	0	0	0	0	0	0.602	0	0.568	0.82
RAB8A	CFTR	1848223	1842118	9606.ENSP00000300935	9606.ENSP00000003084	0	0	0	0	0	0	0	0.819	0.82
HIST2H2AA4	HIST1H2BC	1854965	1850384	9606.ENSP00000358155	9606.ENSP00000321744	0	0	0	0	0.492	0.251	0	0.564	0.819
HIST2H2AA4	HIST1H2BD	1854965	1847163	9606.ENSP00000358155	9606.ENSP00000289316	0	0	0	0	0.492	0.251	0	0.564	0.819
HIST2H2AA4	HIST2H2BE	1854965	1854962	9606.ENSP00000358155	9606.ENSP00000358151	0	0	0	0	0.492	0.251	0	0.564	0.819
IKZF3	IKZF1	1852827	1851367	9606.ENSP00000344544	9606.ENSP00000331614	0	0	0	0.95	0	0.809	0	0.962	0.818
THBS4	ITGB6	1852244	1846843	9606.ENSP00000339730	9606.ENSP00000283249	0	0	0	0	0	0	0.8	0.128	0.818
HDAC9	ESR1	1860731	1842435	9606.ENSP00000408617	9606.ENSP00000206249	0	0	0	0	0	0.576	0	0.586	0.816
SPDYA	CDC25C	1851880	1850370	9606.ENSP00000335628	9606.ENSP00000321656	0	0	0	0	0	0	0.8	0.117	0.816
VSIG2	CYP27A1	1850069	1844601	9606.ENSP00000318684	9606.ENSP00000258415	0	0	0	0	0	0	0	0.811	0.811
ACAN	ABI3	1859267	1843063	9606.ENSP00000387356	9606.ENSP00000225941	0	0	0	0	0	0	0	0.81	0.81
HIST1H4H	HIST1H2BD	1847164	1847163	9606.ENSP00000289352	9606.ENSP00000289316	0	0	0	0	0.269	0.284	0	0.665	0.809
SLC2A4	GATA6	1850296	1846076	9606.ENSP00000320935	9606.ENSP00000269216	0	0	0	0	0	0	0	0.808	0.808
FTCD	ASS1	1847305	1844185	9606.ENSP00000291670	9606.ENSP00000253004	0	0	0	0	0	0	0.8	0.081	0.808
NR5A2	SLC2A4	1854575	1850296	9606.ENSP00000356331	9606.ENSP00000320935	0	0	0	0	0	0	0	0.806	0.806
HIST1H3E	HIST1H2BC	1854001	1850384	9606.ENSP00000353581	9606.ENSP00000321744	0	0	0	0	0.152	0.297	0	0.698	0.804
H2AFX	HIST1H4I	1856252	1853039	9606.ENSP00000364310	9606.ENSP00000346316	0	0.001	0	0	0.359	0.26	0	0.616	0.802
PIK3CG	THRA	1853801	1845577	9606.ENSP00000352121	9606.ENSP00000264637	0	0	0	0	0	0	0.8	0.046	0.801
TGM2	PDGFRB	1854355	1844996	9606.ENSP00000355330	9606.ENSP00000261799	0	0	0	0	0	0	0	0.801	0.801
LPAR4	PIK3CG	1855877	1853801	9606.ENSP00000362398	9606.ENSP00000352121	0	0	0	0	0	0	0.8	0	0.8
HDAC9	WISP2	1860731	1842356	9606.ENSP00000408617	9606.ENSP00000190983	0	0	0	0	0	0	0	0.8	0.8
FTCD	ACY3	1847305	1844352	9606.ENSP00000291670	9606.ENSP00000255082	0	0	0	0	0	0	0.8	0	0.8
H2AFX	HIST1H3E	1856252	1854001	9606.ENSP00000364310	9606.ENSP00000353581	0	0	0	0	0.179	0.243	0	0.705	0.8
BMP2	DACH2	1856935	1855836	9606.ENSP00000368104	9606.ENSP00000362217	0	0	0	0	0	0.177	0	0.759	0.793
HIST1H4I	HIST1H2BD	1853039	1847163	9606.ENSP00000346316	9606.ENSP00000289316	0	0	0	0	0.269	0.284	0	0.633	0.791
ZAP70	BLNK	1845655	1842996	9606.ENSP00000264972	9606.ENSP00000224337	0	0	0	0	0.071	0.102	0	0.768	0.79
GPRC5C	MYL4	1858026	1853126	9606.ENSP00000376403	9606.ENSP00000347055	0	0	0	0	0	0	0	0.783	0.783
HSPA1A	DNAJC5G	1856351	1847674	9606.ENSP00000364802	9606.ENSP00000296097	0.462	0	0	0	0.273	0.235	0	0.34	0.776
HSPA6	DNAJC5G	1849273	1847674	9606.ENSP00000310219	9606.ENSP00000296097	0.462	0	0	0	0.273	0.235	0	0.34	0.776
HSPA1B	DNAJC5G	1856350	1847674	9606.ENSP00000364801	9606.ENSP00000296097	0.462	0	0	0	0.273	0.235	0	0.34	0.776
BMP2	GPC6	1856935	1856600	9606.ENSP00000368104	9606.ENSP00000366246	0	0	0	0	0	0.099	0	0.757	0.771
HIPK3	TCF7L1	1848613	1846772	9606.ENSP00000304226	9606.ENSP00000282111	0	0	0	0	0.071	0.063	0	0.757	0.77
TNFRSF1B	TRAIP	1856466	1851007	9606.ENSP00000365435	9606.ENSP00000328203	0	0	0	0	0	0.564	0	0.495	0.77
UCHL3	USP2	1856711	1844761	9606.ENSP00000366819	9606.ENSP00000260187	0	0	0	0	0	0	0	0.77	0.77
TDO2	KMO	1862280	1854396	9606.ENSP00000444788	9606.ENSP00000355517	0.083	0	0	0	0.088	0	0	0.745	0.769
HIST1H3E	HIST1H4I	1854001	1853039	9606.ENSP00000353581	9606.ENSP00000346316	0	0	0	0	0.181	0.301	0	0.612	0.758
CXXC1	HIST2H3D	1859496	1851568	9606.ENSP00000390475	9606.ENSP00000333277	0	0	0	0	0	0.757	0	0	0.757
DNAH12	DNAH5	1849546	1845692	9606.ENSP00000312554	9606.ENSP00000265104	0	0.004	0	0	0	0	0	0.756	0.756
MAPKAPK2	PHC2	1854515	1844487	9606.ENSP00000356070	9606.ENSP00000257118	0	0	0	0	0	0.576	0	0.446	0.755
BMP2	MAPK10	1856935	1853804	9606.ENSP00000368104	9606.ENSP00000352157	0	0	0	0	0	0	0	0.754	0.755
HIST1H3E	HIST1H4H	1854001	1847164	9606.ENSP00000353581	9606.ENSP00000289352	0	0	0	0	0.181	0.301	0	0.605	0.754
AGMO	CYP46A1	1852487	1845001	9606.ENSP00000341662	9606.ENSP00000261835	0	0	0	0	0.145	0.165	0	0.68	0.752
NFAM1	ZAP70	1851613	1845655	9606.ENSP00000333680	9606.ENSP00000264972	0	0	0	0	0	0.576	0	0.438	0.751
GATA6	CDX1	1846076	1843298	9606.ENSP00000269216	9606.ENSP00000231656	0	0	0	0	0	0	0	0.751	0.751
H2AFX	HIST2H3D	1856252	1851568	9606.ENSP00000364310	9606.ENSP00000333277	0	0	0	0	0.184	0.361	0	0.56	0.75
HIST2H2AA4	HIST2H3D	1854965	1851568	9606.ENSP00000358155	9606.ENSP00000333277	0	0	0	0	0.184	0.361	0	0.56	0.75
SPOCK2	MMP16	1850312	1847020	9606.ENSP00000321108	9606.ENSP00000286614	0	0	0	0	0	0	0	0.749	0.749
BMP2	RHBDL2	1856935	1847159	9606.ENSP00000368104	9606.ENSP00000289248	0	0	0	0	0	0.301	0	0.651	0.746
TRAIP	TNFRSF8	1851007	1845439	9606.ENSP00000328203	9606.ENSP00000263932	0	0	0	0	0	0.564	0	0.44	0.745
RASGRP3	DGKI	1858911	1847128	9606.ENSP00000384192	9606.ENSP00000288490	0	0	0	0	0	0.576	0.36	0.126	0.742
PLXNA4	SEMA3E	1850523	1848507	9606.ENSP00000323194	9606.ENSP00000303212	0	0	0	0	0	0.087	0	0.726	0.739
ABCA4	ROM1	1855201	1846590	9606.ENSP00000359245	9606.ENSP00000278833	0	0	0	0	0	0	0	0.735	0.735
HIST2H3D	CDC6	1851568	1842453	9606.ENSP00000333277	9606.ENSP00000209728	0	0	0	0	0	0.708	0	0.132	0.735
DACH2	POF1B	1855836	1845210	9606.ENSP00000362217	9606.ENSP00000262753	0	0	0	0	0	0	0	0.734	0.734
HIST1H3E	HIST1H2BD	1854001	1847163	9606.ENSP00000353581	9606.ENSP00000289316	0	0	0	0	0.152	0.297	0	0.584	0.73
JAG1	PARD6A	1844342	1842735	9606.ENSP00000254958	9606.ENSP00000219255	0	0	0	0	0	0	0	0.728	0.728
HIST1H4I	HIST2H3D	1853039	1851568	9606.ENSP00000346316	9606.ENSP00000333277	0	0	0	0	0.181	0.301	0	0.562	0.727
H2AFX	ATRIP	1856252	1850516	9606.ENSP00000364310	9606.ENSP00000323099	0	0	0	0	0	0	0	0.726	0.726
TNFRSF9	KCNJ11	1856697	1852964	9606.ENSP00000366729	9606.ENSP00000345708	0	0	0	0	0	0	0	0.72	0.72
GLYAT	AGA	1852296	1845569	9606.ENSP00000340200	9606.ENSP00000264595	0	0	0	0	0	0	0	0.72	0.72
ZAP70	CD69	1845655	1843140	9606.ENSP00000264972	9606.ENSP00000228434	0	0	0	0	0	0	0	0.718	0.718
AGTR1	GATA6	1846323	1846076	9606.ENSP00000273430	9606.ENSP00000269216	0	0	0	0	0	0	0	0.716	0.717
HIST2H3D	HIST1H2BC	1851568	1850384	9606.ENSP00000333277	9606.ENSP00000321744	0	0	0	0	0.152	0.297	0	0.561	0.715
HIST2H2BE	HIST2H3D	1854962	1851568	9606.ENSP00000358151	9606.ENSP00000333277	0	0	0	0	0.152	0.297	0	0.561	0.715
HIST2H3D	HIST1H2BD	1851568	1847163	9606.ENSP00000333277	9606.ENSP00000289316	0	0	0	0	0.152	0.297	0	0.561	0.715
HIST2H2BE	HIST1H3E	1854962	1854001	9606.ENSP00000358151	9606.ENSP00000353581	0	0	0	0	0.152	0.297	0	0.561	0.715
SPINK4	SPINK6	1857085	1850689	9606.ENSP00000369045	9606.ENSP00000324870	0	0	0	0	0	0	0	0.715	0.715
TCF7L1	CDX1	1846772	1843298	9606.ENSP00000282111	9606.ENSP00000231656	0	0	0	0	0	0	0	0.71	0.711
H1F0	HIST1H4H	1852826	1847164	9606.ENSP00000344504	9606.ENSP00000289352	0	0	0	0	0	0.231	0	0.637	0.709
CDC25C	CDC6	1850370	1842453	9606.ENSP00000321656	9606.ENSP00000209728	0	0	0	0	0.112	0.3	0	0.567	0.707
PIK3CG	SYN3	1853801	1851228	9606.ENSP00000352121	9606.ENSP00000330219	0	0	0	0	0	0	0	0.705	0.705
NEUROG2	EMX1	1849951	1844571	9606.ENSP00000317333	9606.ENSP00000258106	0	0	0	0	0	0	0	0.704	0.704
ALOXE3	ABCA12	1849737	1846282	9606.ENSP00000314879	9606.ENSP00000272895	0	0	0	0	0	0	0	0.704	0.704
HIST2H2AA4	HIST1H3E	1854965	1854001	9606.ENSP00000358155	9606.ENSP00000353581	0	0	0	0	0.179	0.243	0	0.56	0.702
CD34	CD22	1849250	1842254	9606.ENSP00000310036	9606.ENSP00000085219	0	0	0	0	0	0	0	0.701	0.701
ANLN	PACSIN1	1845802	1843716	9606.ENSP00000265748	9606.ENSP00000244458	0	0	0	0	0	0	0	0.701	0.701
E2F2	CDX1	1854335	1843298	9606.ENSP00000355249	9606.ENSP00000231656	0	0	0	0	0	0	0	0.701	0.701
BMP2	ZAP70	1856935	1845655	9606.ENSP00000368104	9606.ENSP00000264972	0	0	0	0	0	0	0	0.701	0.701
CD34	KITLG	1849250	1843134	9606.ENSP00000310036	9606.ENSP00000228280	0	0	0	0	0	0	0	0.7	0.7
TGM2	GLYAT	1854355	1852296	9606.ENSP00000355330	9606.ENSP00000340200	0	0	0	0	0	0	0	0.7	0.7
ABCG5	APOE	1844808	1844127	9606.ENSP00000260645	9606.ENSP00000252486	0	0	0	0	0	0	0	0.7	0.7
INHBA	TGFBR3	1843613	1842474	9606.ENSP00000242208	9606.ENSP00000212355	0	0	0	0	0	0.566	0	0.332	0.697
TCEB3C	POLR2A	1851013	1849743	9606.ENSP00000328232	9606.ENSP00000314949	0	0	0	0	0	0.098	0	0.678	0.697
INCENP	ANLN	1858231	1845802	9606.ENSP00000378295	9606.ENSP00000265748	0	0	0	0	0.522	0	0	0.39	0.696
HIST1H3E	HIST1H1C	1854001	1852230	9606.ENSP00000353581	9606.ENSP00000339566	0	0	0	0	0	0.149	0	0.656	0.695
H2AFX	TSSK6	1856252	1854084	9606.ENSP00000364310	9606.ENSP00000354168	0	0	0	0	0	0.572	0	0.315	0.694
E2F1	MCM7	1852951	1848945	9606.ENSP00000345571	9606.ENSP00000307288	0	0	0	0	0.087	0	0	0.673	0.69
TRPC7	SLC2A4	1861673	1850296	9606.ENSP00000426070	9606.ENSP00000320935	0	0	0	0	0	0	0	0.689	0.689
HSPA6	ERN2	1849273	1844469	9606.ENSP00000310219	9606.ENSP00000256797	0	0	0	0	0	0.275	0	0.586	0.688
FKBP1B	ATP6V0C	1857312	1851182	9606.ENSP00000370373	9606.ENSP00000329757	0	0	0	0	0.084	0.668	0	0	0.682
SERPINE2	SNAI2	1861176	1842190	9606.ENSP00000415786	9606.ENSP00000020945	0	0	0	0	0	0	0	0.682	0.682
HIST1H4H	CDC6	1847164	1842453	9606.ENSP00000289352	9606.ENSP00000209728	0	0	0	0	0	0.663	0	0.097	0.682
HSPA1A	ERN2	1856351	1844469	9606.ENSP00000364802	9606.ENSP00000256797	0	0	0	0	0	0.275	0	0.578	0.681
HSPA1B	ERN2	1856350	1844469	9606.ENSP00000364801	9606.ENSP00000256797	0	0	0	0	0	0.275	0	0.578	0.681
HDAC9	HIST1H3E	1860731	1854001	9606.ENSP00000408617	9606.ENSP00000353581	0.278	0	0	0	0	0.201	0	0.491	0.681
TNFRSF1B	TNFSF10	1856466	1843591	9606.ENSP00000365435	9606.ENSP00000241261	0	0	0	0	0	0	0	0.681	0.681
FRZB	WNT9A	1847536	1846230	9606.ENSP00000295113	9606.ENSP00000272164	0	0	0	0	0	0.232	0	0.597	0.677
NR1I3	SLCO1B1	1854699	1844479	9606.ENSP00000356958	9606.ENSP00000256958	0	0	0	0	0.089	0	0	0.658	0.675
SUGT1P3	HSPA6	1861963	1849273	9606.ENSP00000434236	9606.ENSP00000310219	0	0	0	0	0.167	0.298	0	0.483	0.671
SUGT1P3	HSPA1B	1861963	1856350	9606.ENSP00000434236	9606.ENSP00000364801	0	0	0	0	0.167	0.298	0	0.483	0.671
SUGT1P3	HSPA1A	1861963	1856351	9606.ENSP00000434236	9606.ENSP00000364802	0	0	0	0	0.167	0.298	0	0.483	0.671
MAPK10	MMP16	1853804	1847020	9606.ENSP00000352157	9606.ENSP00000286614	0	0	0	0	0	0	0	0.67	0.67
MAP2K6	ABCA10	1864007	1846061	9606.ENSP00000468348	9606.ENSP00000269081	0	0	0	0	0	0	0	0.669	0.669
CITED1	ESR1	1859353	1842435	9606.ENSP00000388548	9606.ENSP00000206249	0	0	0	0	0	0.576	0	0.25	0.668
HDAC9	H2AFX	1860731	1856252	9606.ENSP00000408617	9606.ENSP00000364310	0	0	0	0	0	0.217	0	0.591	0.666
TNFRSF9	TNFRSF8	1856697	1845439	9606.ENSP00000366729	9606.ENSP00000263932	0	0	0	0	0	0	0	0.66	0.66
POLR2A	KIAA0101	1849743	1848123	9606.ENSP00000314949	9606.ENSP00000300035	0	0	0	0	0	0	0	0.66	0.66
TSPYL6	KRTAP2-3	1861333	1857907	9606.ENSP00000417919	9606.ENSP00000375237	0	0	0	0	0	0	0	0.659	0.659
HIST1H1C	HIST1H4H	1852230	1847164	9606.ENSP00000339566	9606.ENSP00000289352	0	0	0	0	0	0.231	0	0.575	0.659
HIST1H4I	H1F0	1853039	1852826	9606.ENSP00000346316	9606.ENSP00000344504	0	0	0	0	0	0.231	0	0.573	0.658
HIST1H1C	HIST1H2BC	1852230	1850384	9606.ENSP00000339566	9606.ENSP00000321744	0	0	0	0	0	0.077	0	0.644	0.657
KITLG	CSF3	1843134	1843025	9606.ENSP00000228280	9606.ENSP00000225474	0	0	0	0	0	0	0	0.655	0.655
ABCG5	SLCO1B1	1844808	1844479	9606.ENSP00000260645	9606.ENSP00000256958	0	0	0	0	0.108	0	0	0.628	0.654
RAD54L	GINS1	1855592	1845151	9606.ENSP00000361043	9606.ENSP00000262460	0	0	0	0	0.111	0	0	0.626	0.653
HIST1H4I	HIST1H1C	1853039	1852230	9606.ENSP00000346316	9606.ENSP00000339566	0	0	0	0	0	0.231	0	0.564	0.65
ACAN	TGM2	1859267	1854355	9606.ENSP00000387356	9606.ENSP00000355330	0	0	0	0	0	0	0	0.645	0.645
HSPA1A	TSSK6	1856351	1854084	9606.ENSP00000364802	9606.ENSP00000354168	0	0	0	0	0	0.596	0	0.156	0.645
UCHL3	ZNF593	1856711	1856075	9606.ENSP00000366819	9606.ENSP00000363384	0	0	0	0	0	0.644	0	0	0.644
MAPK10	CDC25C	1853804	1850370	9606.ENSP00000352157	9606.ENSP00000321656	0	0	0	0	0	0	0	0.642	0.642
DAZAP2	TCF7L1	1862477	1846772	9606.ENSP00000448051	9606.ENSP00000282111	0	0	0	0	0	0.567	0	0.2	0.639
BMP2	WNT9A	1856935	1846230	9606.ENSP00000368104	9606.ENSP00000272164	0	0	0	0	0	0.158	0	0.589	0.639
FGF17	EMX1	1853842	1844571	9606.ENSP00000352414	9606.ENSP00000258106	0	0	0	0	0	0	0	0.635	0.636
CEBPD	E2F1	1859110	1852951	9606.ENSP00000386165	9606.ENSP00000345571	0	0	0	0	0	0.576	0	0.176	0.635
SPESP1	B4GALNT2	1849514	1848176	9606.ENSP00000312284	9606.ENSP00000300404	0	0	0	0	0	0	0	0.632	0.632
MAPK10	INHBA	1853804	1843613	9606.ENSP00000352157	9606.ENSP00000242208	0	0	0	0	0	0	0	0.63	0.63
FKBP1B	ABCA4	1857312	1855201	9606.ENSP00000370373	9606.ENSP00000359245	0	0	0	0	0	0.099	0	0.606	0.629
CD34	TNFRSF8	1849250	1845439	9606.ENSP00000310036	9606.ENSP00000263932	0	0	0	0	0	0	0	0.626	0.626
CLEC11A	KITLG	1844003	1843134	9606.ENSP00000250340	9606.ENSP00000228280	0	0	0	0	0	0.576	0	0.151	0.624
DDIT3	ERN2	1862449	1844469	9606.ENSP00000447803	9606.ENSP00000256797	0	0	0	0	0	0	0	0.624	0.624
TEK	KCNJ11	1857139	1852964	9606.ENSP00000369375	9606.ENSP00000345708	0	0	0	0	0	0	0	0.623	0.623
H2AFX	POLR2A	1856252	1849743	9606.ENSP00000364310	9606.ENSP00000314949	0	0	0	0	0	0.585	0	0.126	0.622
GRIN2C	ABI3	1847389	1843063	9606.ENSP00000293190	9606.ENSP00000225941	0	0	0	0	0	0	0	0.621	0.621
DACH2	SNAI2	1855836	1842190	9606.ENSP00000362217	9606.ENSP00000020945	0	0	0	0	0	0	0	0.619	0.619
GRPR	GLRA2	1857195	1842690	9606.ENSP00000369643	9606.ENSP00000218075	0	0	0	0	0	0	0	0.619	0.619
H2AFX	HIST1H1C	1856252	1852230	9606.ENSP00000364310	9606.ENSP00000339566	0	0	0	0	0	0.198	0	0.541	0.616
HDAC9	MKI67	1860731	1854841	9606.ENSP00000408617	9606.ENSP00000357643	0	0	0	0	0	0.615	0	0	0.615
ACAN	AGA	1859267	1845569	9606.ENSP00000387356	9606.ENSP00000264595	0	0	0	0	0	0	0	0.614	0.614
TMEM190	CD69	1847321	1843140	9606.ENSP00000291934	9606.ENSP00000228434	0	0	0	0	0	0.613	0	0	0.613
INCENP	MCM7	1858231	1848945	9606.ENSP00000378295	9606.ENSP00000307288	0	0	0	0	0.574	0	0	0.127	0.612
DYNLT3	DNAH5	1856896	1845692	9606.ENSP00000367841	9606.ENSP00000265104	0	0	0	0	0	0.297	0.36	0.201	0.609
SLC2A4	FABP4	1850296	1844407	9606.ENSP00000320935	9606.ENSP00000256104	0	0	0	0	0	0	0	0.604	0.604
NTM	CCKBR	1859959	1851860	9606.ENSP00000396722	9606.ENSP00000335544	0	0	0	0	0	0.603	0	0	0.603
AMPH	PACSIN1	1853321	1843716	9606.ENSP00000348602	9606.ENSP00000244458	0	0	0	0	0	0	0	0.602	0.602
CAPSL	MAPK15	1858486	1852026	9606.ENSP00000380523	9606.ENSP00000337691	0	0	0	0	0	0.25	0	0.489	0.6
HDAC9	HIST2H3D	1860731	1851568	9606.ENSP00000408617	9606.ENSP00000333277	0.278	0	0	0	0	0.201	0	0.356	0.596
GABRR2	GABRG1	1859084	1847575	9606.ENSP00000386029	9606.ENSP00000295452	0	0	0	0.838	0	0	0.54	0.727	0.593
MAPK15	DUSP2	1852026	1847145	9606.ENSP00000337691	9606.ENSP00000288943	0	0	0	0	0	0.303	0	0.434	0.589
SH3GL3	PACSIN1	1859553	1843716	9606.ENSP00000391372	9606.ENSP00000244458	0	0	0	0	0	0	0	0.589	0.589
FOXD4L6	SNAI2	1856693	1842190	9606.ENSP00000366693	9606.ENSP00000020945	0	0	0	0	0	0	0	0.589	0.589
HDAC9	IKZF1	1860731	1851367	9606.ENSP00000408617	9606.ENSP00000331614	0	0	0	0	0	0.105	0	0.558	0.588
DNMT1	KIAA0101	1853859	1848123	9606.ENSP00000352516	9606.ENSP00000300035	0	0	0	0	0	0.574	0	0.074	0.588
TAF15	POLR2A	1863971	1849743	9606.ENSP00000466950	9606.ENSP00000314949	0	0	0	0	0	0.576	0	0.064	0.586
ATP6V0C	PDGFRB	1851182	1844996	9606.ENSP00000329757	9606.ENSP00000261799	0	0	0	0	0	0.576	0	0.063	0.585
CITED1	HSPA6	1859353	1849273	9606.ENSP00000388548	9606.ENSP00000310219	0	0	0	0	0	0	0	0.585	0.585
SERPINE2	COL4A4	1861176	1858410	9606.ENSP00000415786	9606.ENSP00000379866	0	0	0	0	0	0.567	0	0.08	0.584
HDAC9	MAPK10	1860731	1853804	9606.ENSP00000408617	9606.ENSP00000352157	0	0	0	0	0	0.57	0	0.072	0.583
CD48	IL18RAP	1854716	1845516	9606.ENSP00000357025	9606.ENSP00000264260	0	0	0	0	0	0.576	0	0.059	0.583
ABCA4	RDH5	1855201	1844549	9606.ENSP00000359245	9606.ENSP00000257895	0	0	0	0	0	0	0	0.582	0.582
APOE	HMOX1	1844127	1842546	9606.ENSP00000252486	9606.ENSP00000216117	0	0	0	0	0	0	0	0.581	0.581
H2AFX	CDC25C	1856252	1850370	9606.ENSP00000364310	9606.ENSP00000321656	0	0	0	0	0	0	0	0.581	0.581
CITED1	HSPA1A	1859353	1856351	9606.ENSP00000388548	9606.ENSP00000364802	0	0	0	0	0	0	0	0.581	0.581
CITED1	HSPA1B	1859353	1856350	9606.ENSP00000388548	9606.ENSP00000364801	0	0	0	0	0	0	0	0.581	0.581
CD34	PDGFRB	1849250	1844996	9606.ENSP00000310036	9606.ENSP00000261799	0	0	0	0	0	0	0	0.581	0.581
SLAMF6	ZAP70	1854717	1845655	9606.ENSP00000357036	9606.ENSP00000264972	0	0	0	0	0	0.576	0	0.052	0.58
TNFRSF8	CD22	1845439	1842254	9606.ENSP00000263932	9606.ENSP00000085219	0	0	0	0	0	0	0	0.58	0.58
HIST1H1C	HIST1H2BD	1852230	1847163	9606.ENSP00000339566	9606.ENSP00000289316	0	0	0	0	0	0.077	0	0.563	0.579
PCSK1	SEC14L5	1849029	1844042	9606.ENSP00000308024	9606.ENSP00000251170	0	0	0	0	0	0.36	0	0.369	0.578
FCN1	ELN	1855554	1844098	9606.ENSP00000360871	9606.ENSP00000252034	0	0	0	0	0	0.576	0	0	0.576
GPC6	EMX1	1856600	1844571	9606.ENSP00000366246	9606.ENSP00000258106	0	0	0	0	0	0	0	0.576	0.576
ASS1	ELN	1844185	1844098	9606.ENSP00000253004	9606.ENSP00000252034	0	0	0	0	0	0.576	0	0	0.576
GABRG1	GLRA2	1847575	1842690	9606.ENSP00000295452	9606.ENSP00000218075	0	0	0	0.86	0	0	0.54	0.546	0.573
HIST1H1C	POLR2A	1852230	1849743	9606.ENSP00000339566	9606.ENSP00000314949	0	0	0	0	0	0.57	0	0	0.57
NR1I3	CYP2A6	1854699	1848249	9606.ENSP00000356958	9606.ENSP00000301141	0	0	0	0	0	0	0	0.57	0.57
COL4A4	CD93	1858410	1843791	9606.ENSP00000379866	9606.ENSP00000246006	0	0	0	0	0	0.57	0	0	0.57
HDAC9	PARK2	1860731	1854466	9606.ENSP00000408617	9606.ENSP00000355865	0	0	0	0	0	0.247	0	0.45	0.568
ZNF804A	NRGN	1848514	1846899	9606.ENSP00000303252	9606.ENSP00000284292	0	0	0	0	0	0	0	0.566	0.566
ATRIP	SFRP1	1850516	1842801	9606.ENSP00000323099	9606.ENSP00000220772	0	0	0	0	0	0.566	0	0	0.566
P2RY2	CFTR	1849283	1842118	9606.ENSP00000310305	9606.ENSP00000003084	0	0	0	0	0	0	0	0.565	0.565
NPRL3	HMOX1	1858775	1842546	9606.ENSP00000382834	9606.ENSP00000216117	0	0	0	0	0	0	0	0.565	0.565
NPC1L1	APOE	1847179	1844127	9606.ENSP00000289547	9606.ENSP00000252486	0	0	0	0	0	0	0	0.564	0.564
HIST2H2BE	TGM2	1854962	1854355	9606.ENSP00000358151	9606.ENSP00000355330	0	0	0	0	0	0.564	0	0	0.564
EIF3I	ESR1	1855943	1842435	9606.ENSP00000362688	9606.ENSP00000206249	0	0	0	0	0	0.564	0	0	0.564
TYRP1	RAB38	1857771	1843678	9606.ENSP00000373570	9606.ENSP00000243662	0	0	0	0	0	0	0	0.563	0.563
SLAMF6	CD48	1854717	1854716	9606.ENSP00000357036	9606.ENSP00000357025	0	0	0	0	0	0	0	0.562	0.562
CA9	HMOX1	1856855	1842546	9606.ENSP00000367608	9606.ENSP00000216117	0	0	0	0	0	0	0	0.561	0.561
CD48	SLAMF7	1854716	1854715	9606.ENSP00000357025	9606.ENSP00000357022	0	0	0	0	0	0	0	0.56	0.56
HDAC9	HIST1H4I	1860731	1853039	9606.ENSP00000408617	9606.ENSP00000346316	0.278	0	0	0	0	0.201	0	0.297	0.559
BMP2	JAG1	1856935	1844342	9606.ENSP00000368104	9606.ENSP00000254958	0	0	0	0	0	0	0	0.555	0.555
RBPJL	JAG1	1852433	1844342	9606.ENSP00000341243	9606.ENSP00000254958	0	0	0	0	0	0	0	0.555	0.555
BLNK	CD22	1842996	1842254	9606.ENSP00000224337	9606.ENSP00000085219	0	0	0	0	0	0	0	0.552	0.552
STYX	MAPK15	1853071	1852026	9606.ENSP00000346599	9606.ENSP00000337691	0	0	0	0	0	0.303	0	0.378	0.547
IGFN1	RNPEPL1	1851753	1846149	9606.ENSP00000334714	9606.ENSP00000270357	0	0	0	0	0	0	0	0.546	0.546
H2AFX	PAPPA	1856252	1851275	9606.ENSP00000364310	9606.ENSP00000330658	0	0	0	0	0	0.545	0	0	0.545
PLCH2	DGKI	1856877	1847128	9606.ENSP00000367747	9606.ENSP00000288490	0	0	0	0	0	0.163	0	0.478	0.544
PLCH1	DGKI	1852997	1847128	9606.ENSP00000345988	9606.ENSP00000288490	0	0	0	0	0	0.163	0	0.478	0.544
HIST1H2BD	CD69	1847163	1843140	9606.ENSP00000289316	9606.ENSP00000228434	0	0	0	0	0	0	0	0.544	0.544
SH3GL3	AMPH	1859553	1853321	9606.ENSP00000391372	9606.ENSP00000348602	0	0	0	0	0	0	0	0.544	0.544
GABRR2	GLRA2	1859084	1842690	9606.ENSP00000386029	9606.ENSP00000218075	0	0	0	0.867	0	0	0.54	0.092	0.543
GLRA2	CFTR	1842690	1842118	9606.ENSP00000218075	9606.ENSP00000003084	0	0	0	0	0	0	0.54	0.042	0.54
GABRR2	CFTR	1859084	1842118	9606.ENSP00000386029	9606.ENSP00000003084	0	0	0	0	0	0	0.54	0	0.54
GABRG1	CFTR	1847575	1842118	9606.ENSP00000295452	9606.ENSP00000003084	0	0	0	0	0	0	0.54	0	0.54
APOE	ESR1	1844127	1842435	9606.ENSP00000252486	9606.ENSP00000206249	0	0	0	0	0	0	0	0.538	0.538
FGF17	JAG1	1853842	1844342	9606.ENSP00000352414	9606.ENSP00000254958	0	0	0	0	0	0	0	0.538	0.538
WEE2	CDC6	1858500	1842453	9606.ENSP00000380675	9606.ENSP00000209728	0	0	0	0	0.176	0.149	0	0.394	0.537
AGTR1	APOE	1846323	1844127	9606.ENSP00000273430	9606.ENSP00000252486	0	0	0	0	0	0	0	0.537	0.537
PIK3CG	PLCH1	1853801	1852997	9606.ENSP00000352121	9606.ENSP00000345988	0	0	0	0	0	0.149	0	0.478	0.536
PLCH2	PIK3CG	1856877	1853801	9606.ENSP00000367747	9606.ENSP00000352121	0	0	0	0	0	0.149	0	0.478	0.536
MAF	HMOX1	1850887	1842546	9606.ENSP00000327048	9606.ENSP00000216117	0	0	0	0	0	0	0	0.535	0.535
IL34	PDGFRB	1847110	1844996	9606.ENSP00000288098	9606.ENSP00000261799	0	0	0	0	0	0	0	0.533	0.533
PIK3CG	SLC2A4	1853801	1850296	9606.ENSP00000352121	9606.ENSP00000320935	0	0	0	0	0	0	0	0.53	0.53
JAG1	SNAI2	1844342	1842190	9606.ENSP00000254958	9606.ENSP00000020945	0	0	0	0	0	0	0	0.53	0.53
BMP2	WFIKKN1	1856935	1850674	9606.ENSP00000368104	9606.ENSP00000324763	0	0	0	0	0	0.484	0	0.116	0.524
ZAP70	CD22	1845655	1842254	9606.ENSP00000264972	9606.ENSP00000085219	0	0	0	0	0.072	0	0	0.507	0.522
ABCG5	CYP27A1	1844808	1844601	9606.ENSP00000260645	9606.ENSP00000258415	0	0	0	0	0	0	0	0.52	0.52
E2F1	CDX1	1852951	1843298	9606.ENSP00000345571	9606.ENSP00000231656	0	0	0	0	0	0	0	0.518	0.518
H2AFX	CDC6	1856252	1842453	9606.ENSP00000364310	9606.ENSP00000209728	0	0	0	0	0	0.167	0	0.445	0.518
MAPK10	PIK3CG	1853804	1853801	9606.ENSP00000352157	9606.ENSP00000352121	0	0	0	0	0	0	0	0.515	0.516
H2AFX	H1F0	1856252	1852826	9606.ENSP00000364310	9606.ENSP00000344504	0	0	0	0	0	0.198	0	0.422	0.516
RBM34	LIN28A	1859138	1844280	9606.ENSP00000386226	9606.ENSP00000254231	0	0	0	0	0	0.481	0	0.105	0.515
ALPL	GPLD1	1856185	1843232	9606.ENSP00000363965	9606.ENSP00000230036	0	0	0	0	0	0	0	0.515	0.515
CDX1	SNAI2	1843298	1842190	9606.ENSP00000231656	9606.ENSP00000020945	0	0	0	0	0	0	0	0.514	0.514
HSD17B13	RDH5	1851572	1844549	9606.ENSP00000333300	9606.ENSP00000257895	0	0	0.398	0	0	0	0	0.225	0.513
HMGN2	SLC6A9	1854330	1854035	9606.ENSP00000355228	9606.ENSP00000353791	0	0	0	0	0	0	0	0.512	0.512
PRELP	PDE7B	1852755	1849328	9606.ENSP00000343924	9606.ENSP00000310661	0	0	0	0	0	0.203	0	0.412	0.511
LRRN2	PDE7B	1854535	1849328	9606.ENSP00000356143	9606.ENSP00000310661	0	0	0	0	0	0.203	0	0.412	0.511
HSPA6	CFTR	1849273	1842118	9606.ENSP00000310219	9606.ENSP00000003084	0	0	0	0	0	0.162	0	0.44	0.511
DPP6	PCSK1	1856752	1849029	9606.ENSP00000367001	9606.ENSP00000308024	0	0	0	0	0.072	0	0	0.494	0.51
NR5A2	GATA6	1854575	1846076	9606.ENSP00000356331	9606.ENSP00000269216	0	0	0	0	0	0	0	0.51	0.51
MAPK10	AGTR1	1853804	1846323	9606.ENSP00000352157	9606.ENSP00000273430	0	0	0	0	0	0	0	0.51	0.51
ROM1	GPR83	1846590	1843679	9606.ENSP00000278833	9606.ENSP00000243673	0	0	0	0	0	0	0	0.509	0.509
B4GALNT2	SEMA3A	1848176	1845736	9606.ENSP00000300404	9606.ENSP00000265362	0	0	0	0	0	0	0	0.509	0.509
H2AFX	PARK2	1856252	1854466	9606.ENSP00000364310	9606.ENSP00000355865	0	0	0	0	0	0	0	0.508	0.508
FAM180A	LURAP1L	1852582	1850305	9606.ENSP00000342336	9606.ENSP00000321026	0	0	0	0	0	0	0	0.507	0.507
PIK3CG	GRAP2	1853801	1852185	9606.ENSP00000352121	9606.ENSP00000339186	0	0	0	0	0	0	0	0.507	0.507
CFH	GPR83	1854590	1843679	9606.ENSP00000356399	9606.ENSP00000243673	0	0	0	0	0	0	0	0.507	0.507
DDIT3	HMOX1	1862449	1842546	9606.ENSP00000447803	9606.ENSP00000216117	0	0	0	0	0	0	0	0.507	0.507
CSF3R	CD34	1855831	1849250	9606.ENSP00000362195	9606.ENSP00000310036	0	0	0	0	0	0	0	0.506	0.506
HDAC9	TNFSF10	1860731	1843591	9606.ENSP00000408617	9606.ENSP00000241261	0	0	0	0	0	0	0	0.504	0.504
TEK	JAG1	1857139	1844342	9606.ENSP00000369375	9606.ENSP00000254958	0	0	0	0	0	0	0	0.503	0.503
KHK	KLB	1844802	1844507	9606.ENSP00000260598	9606.ENSP00000257408	0	0	0	0	0	0	0	0.502	0.503
ST8SIA6	ABI3BP	1856713	1846902	9606.ENSP00000366827	9606.ENSP00000284322	0	0	0	0	0	0	0	0.502	0.502
SERPINE2	AMPH	1861176	1853321	9606.ENSP00000415786	9606.ENSP00000348602	0	0	0	0	0	0	0	0.501	0.501
CLEC11A	TNFSF10	1844003	1843591	9606.ENSP00000250340	9606.ENSP00000241261	0	0	0	0	0	0	0	0.501	0.501
WNT9A	CDX1	1846230	1843298	9606.ENSP00000272164	9606.ENSP00000231656	0	0	0	0	0	0	0	0.499	0.499
DPP6	SLC9A9	1856752	1850225	9606.ENSP00000367001	9606.ENSP00000320246	0	0	0	0	0	0	0	0.499	0.499
NPRL3	CCKBR	1858775	1851860	9606.ENSP00000382834	9606.ENSP00000335544	0	0	0	0	0	0	0	0.499	0.499
RBPJL	DTX1	1852433	1844520	9606.ENSP00000341243	9606.ENSP00000257600	0	0	0	0	0	0	0	0.498	0.497
PPIL6	HSPA6	1859628	1849273	9606.ENSP00000392257	9606.ENSP00000310219	0	0	0	0	0.135	0.149	0	0.371	0.496
PPIL6	HSPA1B	1859628	1856350	9606.ENSP00000392257	9606.ENSP00000364801	0	0	0	0	0.135	0.149	0	0.371	0.496
PPIL6	HSPA1A	1859628	1856351	9606.ENSP00000392257	9606.ENSP00000364802	0	0	0	0	0.135	0.149	0	0.371	0.496
GINS2	CDC6	1844233	1842453	9606.ENSP00000253462	9606.ENSP00000209728	0	0	0	0	0.396	0	0	0.198	0.494
CASZ1	PIK3CG	1856591	1853801	9606.ENSP00000366221	9606.ENSP00000352121	0	0	0	0	0	0	0	0.493	0.493
KMO	PHC2	1854396	1844487	9606.ENSP00000355517	9606.ENSP00000257118	0	0	0	0	0	0	0	0.492	0.492
BMP2	SNAI2	1856935	1842190	9606.ENSP00000368104	9606.ENSP00000020945	0	0	0	0	0	0	0	0.489	0.489
SLC7A11	HMOX1	1846679	1842546	9606.ENSP00000280612	9606.ENSP00000216117	0	0	0	0	0	0	0	0.489	0.489
TDO2	FSCN2	1862280	1851746	9606.ENSP00000444788	9606.ENSP00000334665	0	0	0	0	0	0	0	0.486	0.485
DMBX1	ALDH5A1	1853949	1849725	9606.ENSP00000353132	9606.ENSP00000314649	0	0	0	0	0	0	0	0.485	0.485
BMP2	FGF17	1856935	1853842	9606.ENSP00000368104	9606.ENSP00000352414	0	0	0	0	0	0	0	0.483	0.483
ATRIP	SCG2	1850516	1848604	9606.ENSP00000323099	9606.ENSP00000304133	0	0	0	0	0	0.484	0	0	0.483
BMP2	TCF7L1	1856935	1846772	9606.ENSP00000368104	9606.ENSP00000282111	0	0	0	0	0	0	0	0.483	0.483
SLC9A9	CFTR	1850225	1842118	9606.ENSP00000320246	9606.ENSP00000003084	0	0	0	0	0	0	0	0.482	0.482
H1F0	LIN28A	1852826	1844280	9606.ENSP00000344504	9606.ENSP00000254231	0	0	0	0	0	0.481	0	0	0.481
HDGF	GINS2	1854760	1844233	9606.ENSP00000357189	9606.ENSP00000253462	0	0	0	0	0	0	0	0.48	0.48
FGF17	PIK3AP1	1853842	1852259	9606.ENSP00000352414	9606.ENSP00000339826	0	0	0	0	0	0.359	0	0.223	0.48
PLCH2	PARD6A	1856877	1842735	9606.ENSP00000367747	9606.ENSP00000219255	0	0	0	0	0	0	0	0.478	0.479
HIST2H2AA4	HIST1H1C	1854965	1852230	9606.ENSP00000358155	9606.ENSP00000339566	0	0	0	0	0	0.198	0	0.378	0.479
HIST2H2AA4	H1F0	1854965	1852826	9606.ENSP00000358155	9606.ENSP00000344504	0	0	0	0	0	0.198	0	0.378	0.479
HDAC9	HIST1H4H	1860731	1847164	9606.ENSP00000408617	9606.ENSP00000289352	0.278	0	0	0	0	0.201	0	0.167	0.477
TSPAN7	IL1RAPL1	1856875	1848710	9606.ENSP00000367743	9606.ENSP00000305200	0	0	0	0	0	0	0	0.476	0.476
SH3GL3	PARK2	1859553	1854466	9606.ENSP00000391372	9606.ENSP00000355865	0	0	0	0	0	0.361	0	0.215	0.476
CXCL1	CSF3	1858329	1843025	9606.ENSP00000379110	9606.ENSP00000225474	0	0	0	0	0	0	0	0.474	0.474
FTL	HMOX1	1856660	1842546	9606.ENSP00000366525	9606.ENSP00000216117	0	0	0	0	0	0	0	0.473	0.473
VWA7	SPOCK2	1856360	1850312	9606.ENSP00000364840	9606.ENSP00000321108	0	0	0	0	0.473	0	0	0	0.473
PCSK1	SCG2	1849029	1848604	9606.ENSP00000308024	9606.ENSP00000304133	0	0	0	0	0	0	0	0.472	0.472
CD69	CD22	1843140	1842254	9606.ENSP00000228434	9606.ENSP00000085219	0	0	0	0	0	0	0	0.472	0.472
TEK	CD34	1857139	1849250	9606.ENSP00000369375	9606.ENSP00000310036	0	0	0	0	0	0	0	0.472	0.472
RGMA	CSF3	1862790	1843025	9606.ENSP00000452126	9606.ENSP00000225474	0	0	0	0	0	0	0	0.472	0.472
SLC2A4	APOE	1850296	1844127	9606.ENSP00000320935	9606.ENSP00000252486	0	0	0	0	0	0	0	0.472	0.472
ARL9	RAB8A	1853956	1848223	9606.ENSP00000353210	9606.ENSP00000300935	0	0	0	0	0	0.15	0	0.404	0.471
DHRS2	RDH5	1852847	1844549	9606.ENSP00000344674	9606.ENSP00000257895	0	0	0.373	0	0	0	0	0.191	0.471
KCNJ11	CFTR	1852964	1842118	9606.ENSP00000345708	9606.ENSP00000003084	0	0	0	0	0	0	0	0.47	0.47
EPCAM	ESR1	1845405	1842435	9606.ENSP00000263735	9606.ENSP00000206249	0	0	0	0	0	0	0	0.47	0.47
SLC44A5	SLC30A3	1855362	1843350	9606.ENSP00000359892	9606.ENSP00000233535	0	0	0	0	0	0	0	0.469	0.469
NR1I3	ABCG5	1854699	1844808	9606.ENSP00000356958	9606.ENSP00000260645	0	0	0	0	0.074	0	0	0.451	0.469
PARK2	ESR1	1854466	1842435	9606.ENSP00000355865	9606.ENSP00000206249	0	0	0	0	0	0	0	0.464	0.463
EPCAM	SNAI2	1845405	1842190	9606.ENSP00000263735	9606.ENSP00000020945	0	0	0	0	0	0	0	0.464	0.463
FKBP1B	SLC4A5	1857312	1853599	9606.ENSP00000370373	9606.ENSP00000350475	0	0	0	0	0	0.464	0	0	0.463
UNC13A	DOC2B	1861798	1852726	9606.ENSP00000429562	9606.ENSP00000343665	0	0	0	0	0	0	0	0.461	0.461
ANGPT1	JAG1	1861743	1844342	9606.ENSP00000428340	9606.ENSP00000254958	0	0	0	0	0	0	0	0.462	0.461
HECW1	AMPH	1858345	1853321	9606.ENSP00000379228	9606.ENSP00000348602	0	0	0	0	0	0	0	0.461	0.461
HSPA1B	CFTR	1856350	1842118	9606.ENSP00000364801	9606.ENSP00000003084	0	0	0	0	0	0.074	0	0.44	0.46
HSPA1A	CFTR	1856351	1842118	9606.ENSP00000364802	9606.ENSP00000003084	0	0	0	0	0	0.074	0	0.44	0.46
NMNAT1	UPB1	1856640	1850635	9606.ENSP00000366410	9606.ENSP00000324343	0.281	0	0	0	0	0	0	0.281	0.46
RDH5	CDX1	1844549	1843298	9606.ENSP00000257895	9606.ENSP00000231656	0	0	0	0	0	0	0	0.46	0.459
H2AFX	MCM7	1856252	1848945	9606.ENSP00000364310	9606.ENSP00000307288	0	0	0	0	0.112	0.097	0	0.38	0.459
HIST1H3E	H1F0	1854001	1852826	9606.ENSP00000353581	9606.ENSP00000344504	0	0	0	0	0	0.149	0	0.39	0.459
CEBPD	TSSK6	1859110	1854084	9606.ENSP00000386165	9606.ENSP00000354168	0	0	0	0	0	0.149	0	0.389	0.458
TBX10	ADTRP	1851818	1843213	9606.ENSP00000335191	9606.ENSP00000229583	0	0	0	0	0	0	0	0.458	0.457
TNFRSF9	TNFRSF1B	1856697	1856466	9606.ENSP00000366729	9606.ENSP00000365435	0	0	0	0	0	0	0	0.457	0.457
NR5A2	ABCG5	1854575	1844808	9606.ENSP00000356331	9606.ENSP00000260645	0	0	0	0	0	0	0	0.458	0.457
BMP2	FOXD4L6	1856935	1856693	9606.ENSP00000368104	9606.ENSP00000366693	0	0	0	0	0	0	0	0.456	0.456
FABP4	APOE	1844407	1844127	9606.ENSP00000256104	9606.ENSP00000252486	0	0	0	0	0	0	0	0.456	0.456
NEUROG2	FOXN4	1849951	1848023	9606.ENSP00000317333	9606.ENSP00000299162	0	0	0	0	0	0	0	0.456	0.456
PDGFRB	CSF3	1844996	1843025	9606.ENSP00000261799	9606.ENSP00000225474	0	0	0	0	0	0	0	0.456	0.456
FKBP1B	PIK3CG	1857312	1853801	9606.ENSP00000370373	9606.ENSP00000352121	0	0	0	0	0	0.108	0	0.411	0.452
HDAC9	CDC6	1860731	1842453	9606.ENSP00000408617	9606.ENSP00000209728	0	0	0	0	0	0.242	0	0.306	0.451
HIST1H3E	CDC6	1854001	1842453	9606.ENSP00000353581	9606.ENSP00000209728	0	0	0	0	0	0.361	0	0.177	0.451
SLCO1C1	NR1I3	1857396	1854699	9606.ENSP00000370964	9606.ENSP00000356958	0	0	0	0	0	0	0	0.451	0.451
DNMT1	SFRP1	1853859	1842801	9606.ENSP00000352516	9606.ENSP00000220772	0	0	0	0	0	0.103	0	0.413	0.45
THEM6	FAT3	1852121	1847922	9606.ENSP00000338607	9606.ENSP00000298047	0	0	0	0	0	0	0	0.45	0.45
FGF17	CDX1	1853842	1843298	9606.ENSP00000352414	9606.ENSP00000231656	0	0	0	0	0	0.154	0	0.373	0.447
HIST1H1C	HIST2H3D	1852230	1851568	9606.ENSP00000339566	9606.ENSP00000333277	0	0	0	0	0	0.149	0	0.376	0.446
H1F0	HIST2H3D	1852826	1851568	9606.ENSP00000344504	9606.ENSP00000333277	0	0	0	0	0	0.149	0	0.376	0.446
DYNLT3	KIF21B	1856896	1851046	9606.ENSP00000367841	9606.ENSP00000328494	0	0	0	0	0	0	0	0.442	0.442
RBM34	TINAG	1859138	1844722	9606.ENSP00000386226	9606.ENSP00000259782	0	0	0	0	0	0	0	0.44	0.44
TMEM158	GZMM	1861563	1845565	9606.ENSP00000422431	9606.ENSP00000264553	0	0	0	0	0	0	0	0.44	0.44
LYPD3	ESR1	1843711	1842435	9606.ENSP00000244333	9606.ENSP00000206249	0	0	0	0	0	0	0	0.44	0.44
COL17A1	NNMT	1852387	1848116	9606.ENSP00000340937	9606.ENSP00000299964	0	0	0	0	0	0	0	0.439	0.439
MEGF10	MYO15A	1846387	1842432	9606.ENSP00000274473	9606.ENSP00000205890	0	0	0	0	0.438	0	0	0	0.438
INSIG1	ABCG5	1852851	1844808	9606.ENSP00000344741	9606.ENSP00000260645	0	0	0	0	0	0	0	0.436	0.436
UNC13A	CLSTN2	1861798	1860345	9606.ENSP00000429562	9606.ENSP00000402460	0	0	0	0	0.435	0	0	0	0.435
RAD54L	POLR2A	1855592	1849743	9606.ENSP00000361043	9606.ENSP00000314949	0	0	0	0	0.075	0.303	0	0.193	0.434
CDX1	ESR1	1843298	1842435	9606.ENSP00000231656	9606.ENSP00000206249	0	0	0	0	0	0	0	0.431	0.431
HIST1H1C	BTG2	1852230	1847240	9606.ENSP00000339566	9606.ENSP00000290551	0	0	0	0	0	0	0	0.43	0.43
OXCT2	KMO	1855763	1854396	9606.ENSP00000361914	9606.ENSP00000355517	0.118	0	0	0	0	0	0	0.38	0.429
E2F2	CDC25C	1854335	1850370	9606.ENSP00000355249	9606.ENSP00000321656	0	0	0	0	0	0	0	0.428	0.428
HDAC9	IKZF3	1860731	1852827	9606.ENSP00000408617	9606.ENSP00000344544	0	0	0	0	0	0.105	0	0.386	0.427
DUOX2	HMOX1	1857787	1842546	9606.ENSP00000373691	9606.ENSP00000216117	0	0	0	0	0	0	0	0.426	0.426
HECW1	POLR2A	1858345	1849743	9606.ENSP00000379228	9606.ENSP00000314949	0	0	0	0	0.073	0.33	0	0.151	0.426
PDGFRB	ESR1	1844996	1842435	9606.ENSP00000261799	9606.ENSP00000206249	0	0	0	0	0	0.063	0	0.41	0.423
HIST1H4I	IKZF1	1853039	1851367	9606.ENSP00000346316	9606.ENSP00000331614	0	0	0	0	0.083	0.077	0	0.373	0.423
TENM1	EMX1	1860441	1844571	9606.ENSP00000403954	9606.ENSP00000258106	0	0	0	0	0	0	0	0.422	0.422
CITED1	MPZL2	1859353	1846604	9606.ENSP00000388548	9606.ENSP00000278937	0	0	0	0	0	0	0	0.421	0.421
SPTB	COL14A1	1857851	1847909	9606.ENSP00000374372	9606.ENSP00000297848	0	0	0	0	0	0	0	0.421	0.421
PAPPA	FPR1	1851275	1848441	9606.ENSP00000330658	9606.ENSP00000302707	0	0	0	0	0	0	0	0.42	0.42
TEK	APOE	1857139	1844127	9606.ENSP00000369375	9606.ENSP00000252486	0	0	0	0	0	0	0	0.418	0.418
MAP2K6	TSSK6	1864007	1854084	9606.ENSP00000468348	9606.ENSP00000354168	0	0	0.405	0	0	0	0	0.061	0.417
ANGPT1	KITLG	1861743	1843134	9606.ENSP00000428340	9606.ENSP00000228280	0	0	0	0	0	0	0	0.417	0.416
H1F0	HIST1H2BC	1852826	1850384	9606.ENSP00000344504	9606.ENSP00000321744	0	0	0	0	0	0.077	0	0.393	0.416
ZNF841	FRRS1	1857830	1847069	9606.ENSP00000374185	9606.ENSP00000287474	0	0	0	0	0	0	0	0.417	0.416
PARK2	CFTR	1854466	1842118	9606.ENSP00000355865	9606.ENSP00000003084	0	0	0	0	0	0	0	0.417	0.416
H1F0	HIST1H2BD	1852826	1847163	9606.ENSP00000344504	9606.ENSP00000289316	0	0	0	0	0	0.077	0	0.392	0.415
DYNLT3	DNAH12	1856896	1849546	9606.ENSP00000367841	9606.ENSP00000312554	0	0	0	0	0	0.297	0	0.201	0.414
CFH	APOE	1854590	1844127	9606.ENSP00000356399	9606.ENSP00000252486	0	0	0	0	0	0	0	0.414	0.414
CDH15	ITGB6	1847184	1846843	9606.ENSP00000289746	9606.ENSP00000283249	0	0	0	0	0	0	0	0.413	0.414
ABCA4	APOE	1855201	1844127	9606.ENSP00000359245	9606.ENSP00000252486	0	0	0	0	0	0	0	0.415	0.414
HMOX1	ESR1	1842546	1842435	9606.ENSP00000216117	9606.ENSP00000206249	0	0	0	0	0	0	0	0.414	0.414
ALPL	PRELP	1856185	1852755	9606.ENSP00000363965	9606.ENSP00000343924	0	0	0	0	0	0	0	0.414	0.414
BMP2	ESR1	1856935	1842435	9606.ENSP00000368104	9606.ENSP00000206249	0	0	0	0	0	0	0	0.415	0.414
BMP2	SFRP1	1856935	1842801	9606.ENSP00000368104	9606.ENSP00000220772	0	0	0	0	0	0	0	0.413	0.413
TYRP1	MAGEA3	1857771	1855211	9606.ENSP00000373570	9606.ENSP00000359301	0	0	0	0	0	0	0	0.413	0.412
DTYMK	CDC6	1848672	1842453	9606.ENSP00000304802	9606.ENSP00000209728	0	0	0	0	0	0	0	0.412	0.412
KCNJ11	KCNK3	1852964	1848825	9606.ENSP00000345708	9606.ENSP00000306275	0	0	0	0	0	0	0	0.413	0.412
MAPK10	TGFBR3	1853804	1842474	9606.ENSP00000352157	9606.ENSP00000212355	0	0	0	0	0	0	0	0.413	0.412
ROM1	RDH5	1846590	1844549	9606.ENSP00000278833	9606.ENSP00000257895	0	0	0	0	0	0	0	0.413	0.412
SLC2A4	CFTR	1850296	1842118	9606.ENSP00000320935	9606.ENSP00000003084	0	0	0	0	0	0	0	0.41	0.41
SLCO1B1	HMOX1	1844479	1842546	9606.ENSP00000256958	9606.ENSP00000216117	0	0	0	0	0	0	0	0.409	0.409
ANGPT1	THBS2	1861743	1854448	9606.ENSP00000428340	9606.ENSP00000355751	0	0	0	0	0	0	0	0.409	0.408
FSCN2	ROM1	1851746	1846590	9606.ENSP00000334665	9606.ENSP00000278833	0	0	0	0	0	0	0	0.407	0.407
CA9	ESR1	1856855	1842435	9606.ENSP00000367608	9606.ENSP00000206249	0	0	0	0	0	0	0	0.407	0.407
MAPK15	SYN3	1852026	1851228	9606.ENSP00000337691	9606.ENSP00000330219	0	0	0	0	0	0	0	0.406	0.406
OXCT2	ALDH5A1	1855763	1849725	9606.ENSP00000361914	9606.ENSP00000314649	0.084	0	0	0	0	0	0	0.379	0.406
ACAN	MMP16	1859267	1847020	9606.ENSP00000387356	9606.ENSP00000286614	0	0	0	0	0	0	0	0.405	0.405
HIST2H3D	POLR2A	1851568	1849743	9606.ENSP00000333277	9606.ENSP00000314949	0	0	0	0	0	0.305	0	0.18	0.405
SLCO1C1	ABCG5	1857396	1844808	9606.ENSP00000370964	9606.ENSP00000260645	0	0	0	0	0	0	0	0.403	0.404
RPL34	SNCAIP	1858216	1844894	9606.ENSP00000378160	9606.ENSP00000261368	0	0	0	0	0	0	0	0.404	0.404
MAPKAPK2	MAPK15	1854515	1852026	9606.ENSP00000356070	9606.ENSP00000337691	0	0	0	0.654	0	0.297	0	0.459	0.403
HIST2H2BE	H1F0	1854962	1852826	9606.ENSP00000358151	9606.ENSP00000344504	0	0	0	0	0	0.077	0	0.38	0.403
HIST2H2BE	HIST1H1C	1854962	1852230	9606.ENSP00000358151	9606.ENSP00000339566	0	0	0	0	0	0.077	0	0.38	0.403
FOXD4L6	ALX1	1856693	1849786	9606.ENSP00000366693	9606.ENSP00000315417	0	0	0	0	0	0.086	0	0.373	0.402
ALX1	FOXN4	1849786	1848023	9606.ENSP00000315417	9606.ENSP00000299162	0	0	0	0	0	0.086	0	0.373	0.402
FOXD4L6	DMBX1	1856693	1853949	9606.ENSP00000366693	9606.ENSP00000353132	0	0	0	0	0	0.086	0	0.373	0.402
ENPEP	EPCAM	1845702	1845405	9606.ENSP00000265162	9606.ENSP00000263735	0	0	0	0	0	0	0	0.402	0.402
HOPX	FOXN4	1862705	1848023	9606.ENSP00000450527	9606.ENSP00000299162	0	0	0	0	0	0.086	0	0.373	0.402
DMBX1	FOXN4	1853949	1848023	9606.ENSP00000353132	9606.ENSP00000299162	0	0	0	0	0	0.086	0	0.373	0.402
HOPX	FOXD4L6	1862705	1856693	9606.ENSP00000450527	9606.ENSP00000366693	0	0	0	0	0	0.086	0	0.373	0.402
FOXN4	PRRX1	1848023	1843528	9606.ENSP00000299162	9606.ENSP00000239461	0	0	0	0	0	0.086	0	0.373	0.402
FOXD4L6	PRRX1	1856693	1843528	9606.ENSP00000366693	9606.ENSP00000239461	0	0	0	0	0	0.086	0	0.373	0.402
SPTB	SYN3	1857851	1851228	9606.ENSP00000374372	9606.ENSP00000330219	0	0	0	0	0	0	0	0.401	0.401
HIST1H4I	CDC6	1853039	1842453	9606.ENSP00000346316	9606.ENSP00000209728	0	0	0	0	0	0.363	0	0.097	0.4
RAD54L	RAD21	1855592	1847857	9606.ENSP00000361043	9606.ENSP00000297338	0	0	0	0	0	0.252	0	0.231	0.4
